# Supplementary material for: Biodiesel production from rapeseed oil and low free fatty acid waste cooking oil using a cesium modified natural phosphate catalyst
Source: Royal Society of Chemistry journal article supplement (doi:10.1039/d0ra07711a), 2020-01-01
Supplement: d0ra07711a1.pdf [file d0ra07711a1.pdf]

## **Supporting informations**

### **Biodiesel Production from Rapeseed Oil and Low Free Fatty Acids Waste Cooking Oil using Cesium Modified Natural Phosphate Catalyst**

Boutaina Rezki<sup>a</sup>, Younes Essamlali<sup>b</sup>, Mina Aadil<sup>a</sup>, Nawal Semlal<sup>c</sup> and Mohamed Zahouily<sup>\*a,b</sup>

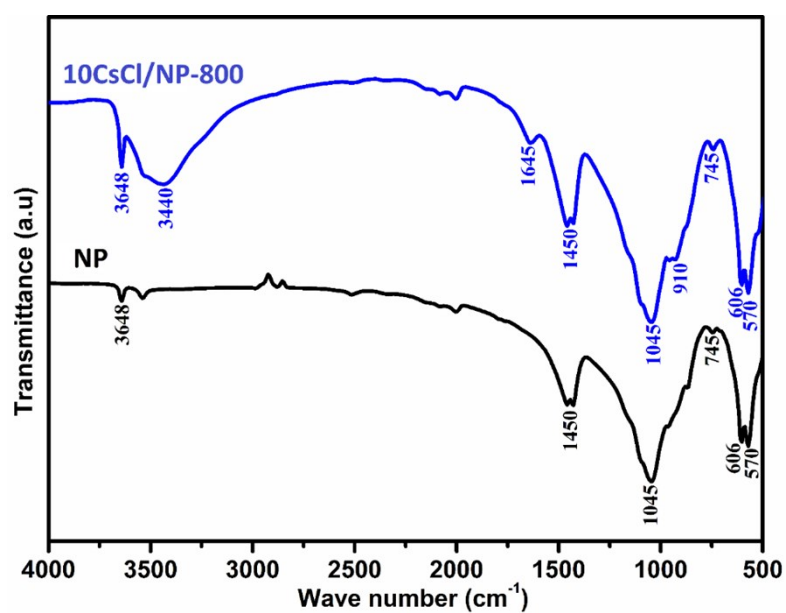

**Figure S1** FTIR of NP and 10CsCl/NP-800.

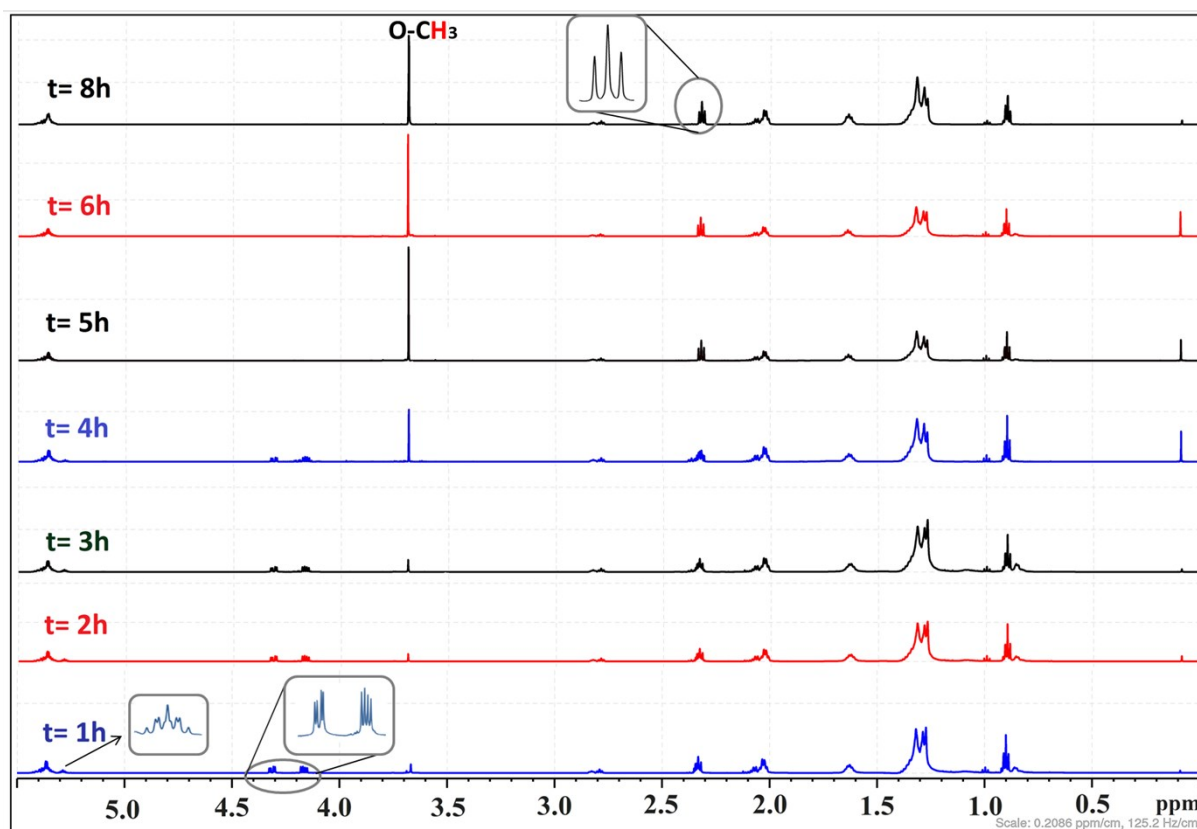

**Figure S2**  $^1\text{H}$ -NMR spectra of the biodiesel samples withdrawn at different interval of time.
